# Supplementary material for: Investigating long-term changes in polar stratospheric clouds above Antarctica during past decades: a temperature-based approach using spaceborne lidar detections
Source: Copernicus journal article supplement (doi:10.5194/acp-24-6433-2024), 2024-05-31
Supplement: Supplementary file 1 [file acp-24-6433-2024-supplement.zip]

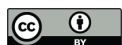

*Supplement of*

## **Investigating long-term changes in polar stratospheric clouds above Antarctica during past decades: a temperature-based approach using spaceborne lidar detections**

**Mathilde Leroux and Vincent Noel**

*Correspondence to:* Mathilde Leroux ([mathilde.leroux@aero.obs-mip.fr](mailto:mathilde.leroux@aero.obs-mip.fr))

- [acp-24-6433-2024-supplement-title-page.pdf](#)
- [data\\_statistical\\_model.txt](#)

The copyright of individual parts of the supplement might differ from the article licence.
